# Supplementary material for: Catalytic oxidative C–C bond cleavage route of levulinic acid and methyl levulinate
Source: Royal Society of Chemistry journal article supplement (doi:10.1039/c6ra16149a), 2016-01-01
Supplement: c6ra16149a1.pdf [file c6ra16149a1.pdf]

## Electronic Supplementary Information

### Catalytic oxidative C-C bond cleavage route of levulinic acid and methyl levulinate

Fei Xia,<sup>a,b</sup> Zhongtian Du,<sup>c</sup> Junxia Liu,<sup>a</sup> Yangyang Ma,<sup>a,b</sup> and Jie Xu\*<sup>a</sup>

<sup>a</sup>State Key Laboratory of Catalysis, Dalian Institute of Chemical Physics, Chinese Academy of Sciences, Dalian National Laboratory for Clean Energy, Dalian 116023, P. R. China

<sup>b</sup>University of Chinese Academy of Sciences, Beijing 100049, P. R. China

E-mail: xujie@dicp.ac.cn

<sup>c</sup>School of Petroleum and Chemical Engineering, Dalian University of Technology, Panjin 124221 P. R. China.

## Figures

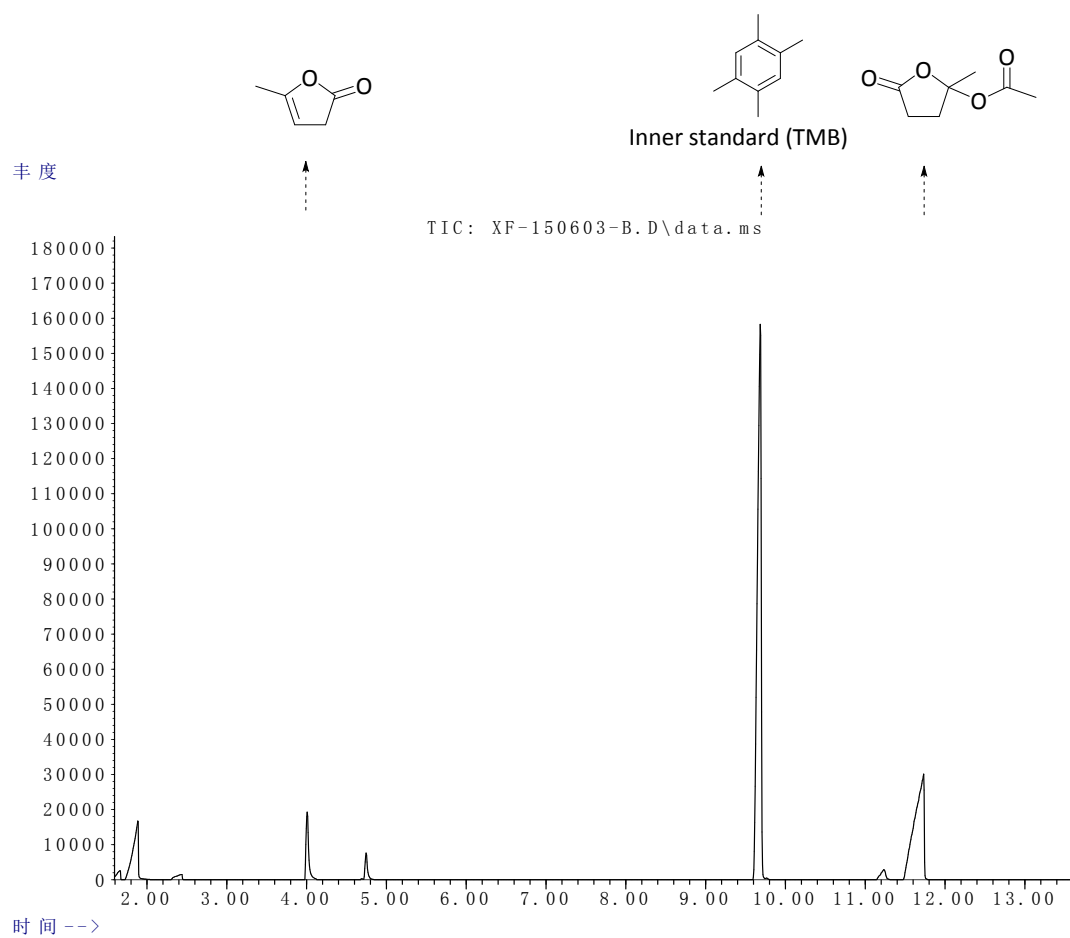

**Figure S1.** GC-MS trace of oxidation products of levulinic acid monitored at 30 min.

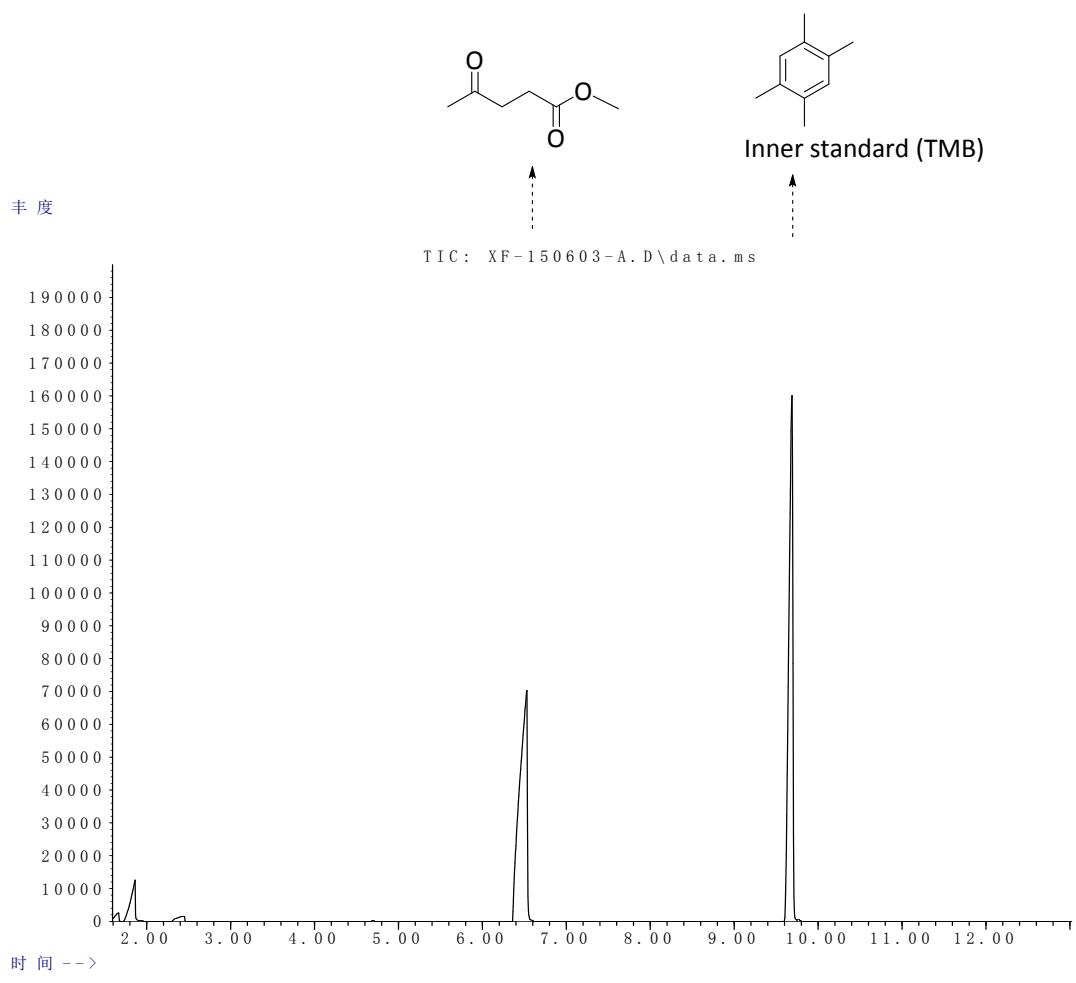

**Figure S2.** GC-MS trace of oxidation products of methyl levulinate monitored at 30 min.

丰度

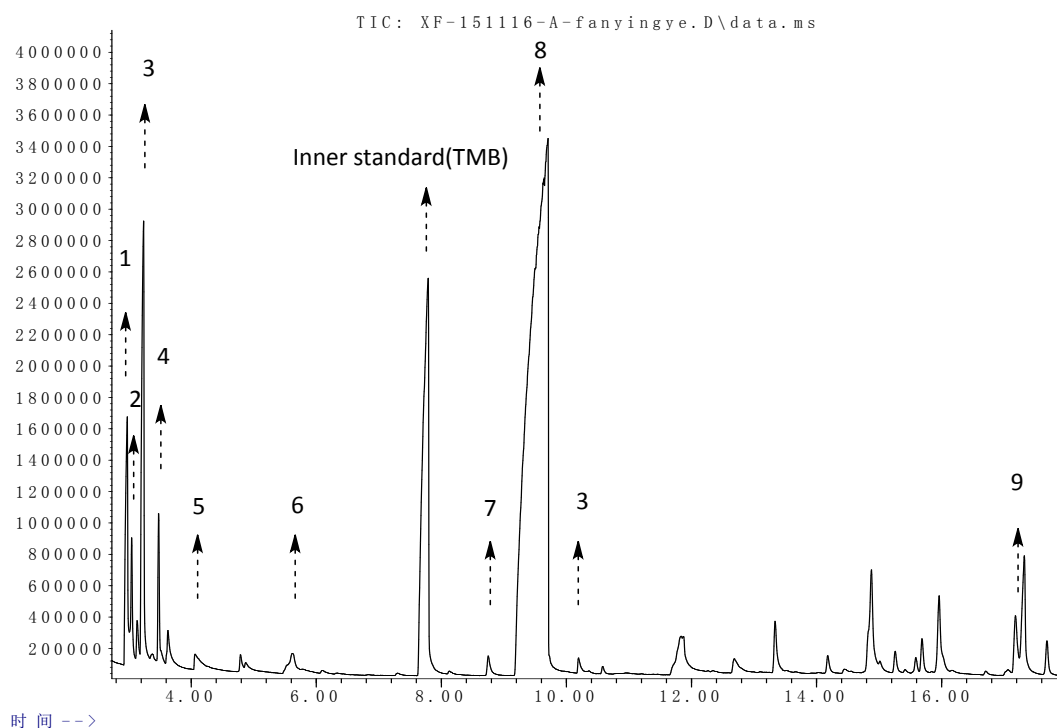

F

**figure S3.** GC-MS Characterization for products of oxidation of levulinic acid catalyzed by  $\text{Mn}(\text{OAc})_3 \cdot 2\text{H}_2\text{O}$  in acetic anhydride.

Peaks assignment of some main products, **1**: maleic anhydride, **2**:  $\alpha$ -angelica lactone, **3**: acetyloxy acetic acid, **4**: 1,1-ethanediol diacetate, **5**:  $\beta$ -angelica lactone, **6**: succinic anhydride, **7**: 1,1,2-ethanetriol triacetate, **8**: 2-methyl-5-oxotetrahydro-2-furanyl acetate, **9**: 4-hydroxy-2-pentenoic acid.

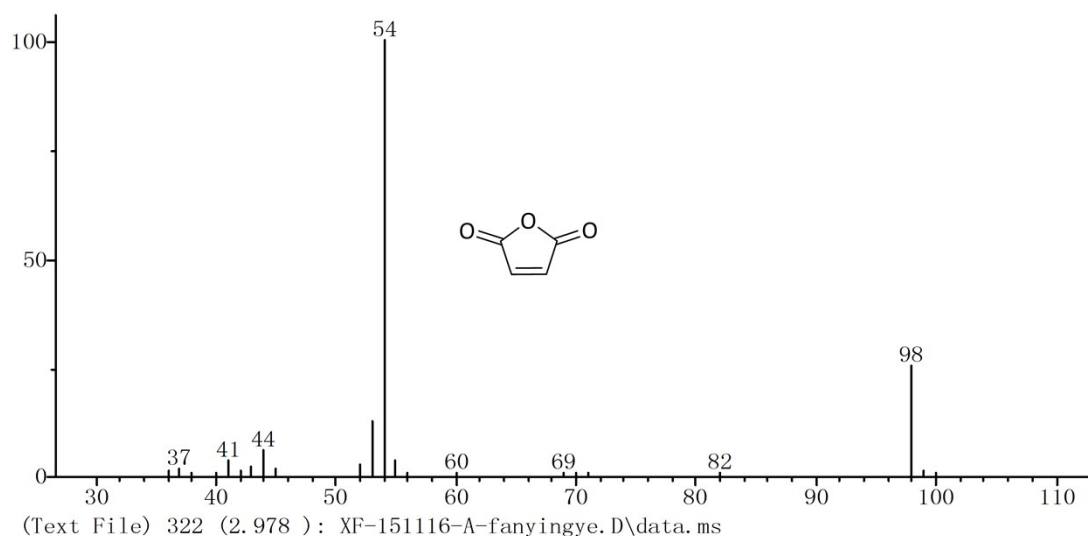

**Figure S4.** Mass spectrum of maleic anhydride (**1**). MS (70 eV):  $m/z$  (%), 98 (25)  $[\text{M}^+]$ , 85 (1), 69 (1), 60 (1), 55 (4), 54 (100), 53 (13), 44 (6), 41 (4), 36 (1), 32 (1).

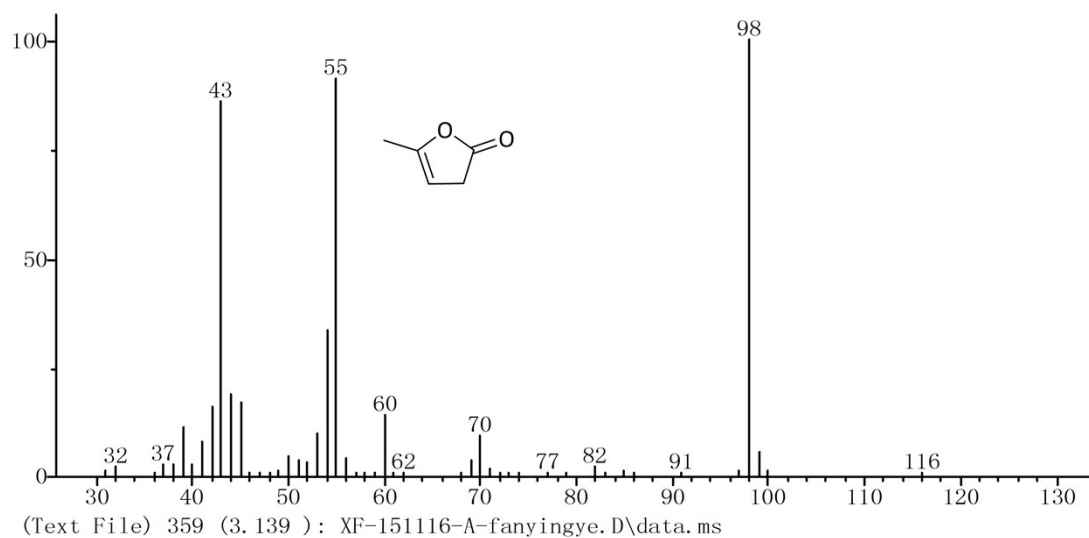

**Figure S5.** Mass spectrum of  $\alpha$ -angelica lactone (**2**). MS (70 eV):  $m/z$  (%), 98 (100) [M<sup>+</sup>], 82 (2), 70 (10), 60 (14), 55 (91), 54 (33), 43 (86), 37 (2), 32 (1).

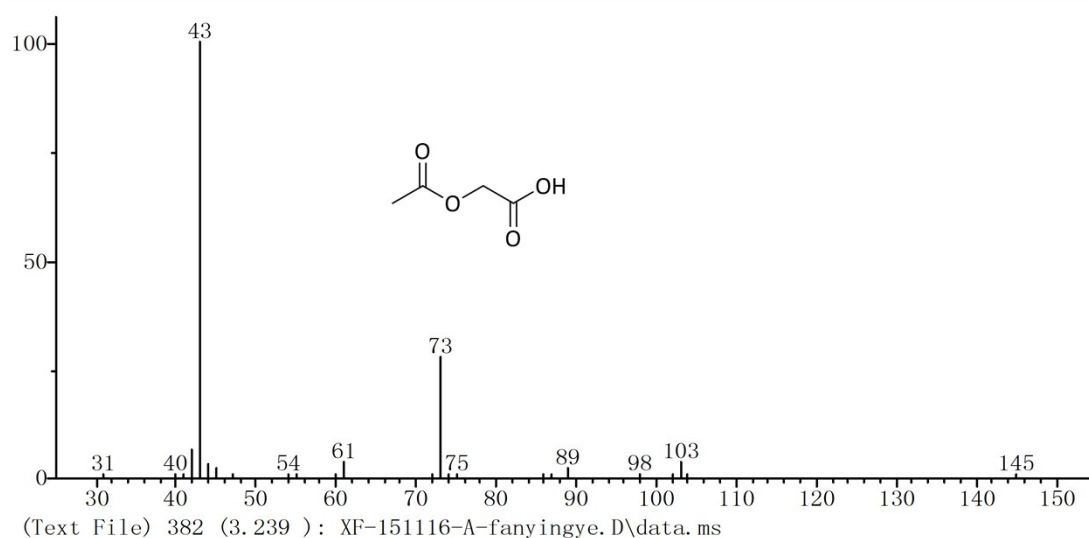

**Figure S6.** Mass spectrum of acetyloxy acetic acid (**3**). MS (70 eV):  $m/z$  (%), 118 (0) [M<sup>+</sup>], 145 (1), 103 (4), 98 (1), 89 (2), 73 (27), 43 (100), 42 (6), 31 (1).

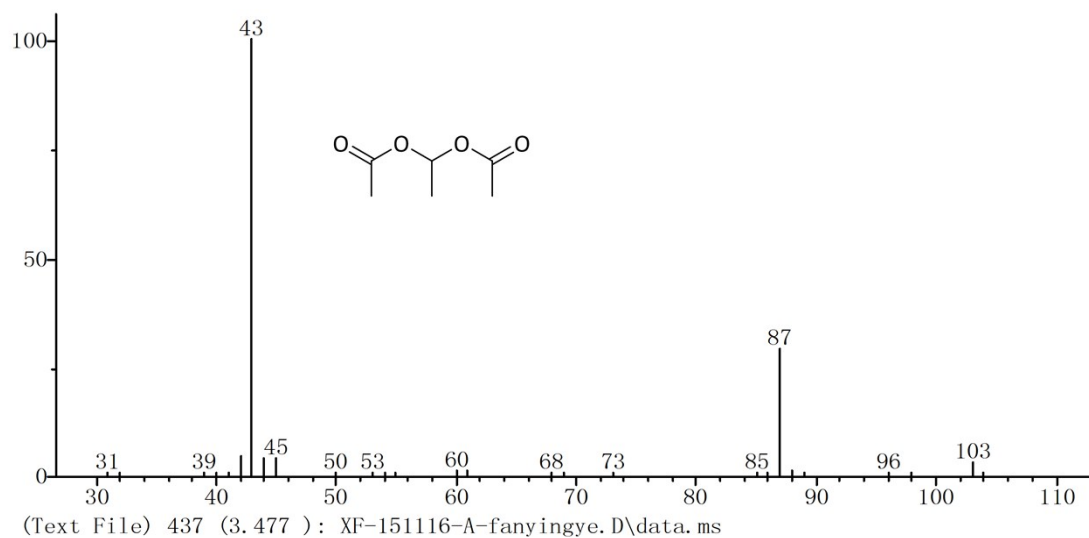

**Figure S7.** Mass spectrum of 1,1-ethanediol diacetate (**4**). MS (70 eV):  $m/z$  (%), 146 (0) [M<sup>+</sup>], 103 (3), 96 (1), 87 (30), 85 (1), 73 (1), 60 (1), 45 (4), 43 (100), 31 (1).

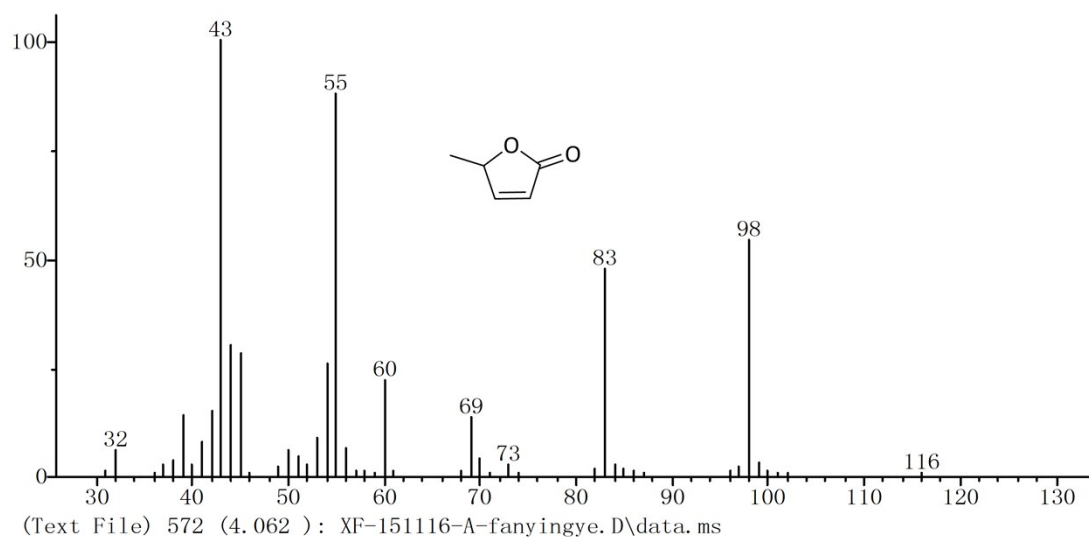

**Figure S8.** Mass spectrum of  $\beta$ -angelica lactone (**5**). MS (70 eV):  $m/z$  (%), 98 (54) [M<sup>+</sup>], 116 (1), 83 (47), 73 (3), 69 (13), 60 (22), 55 (88), 45 (28), 44 (30), 43 (100), 32 (6).

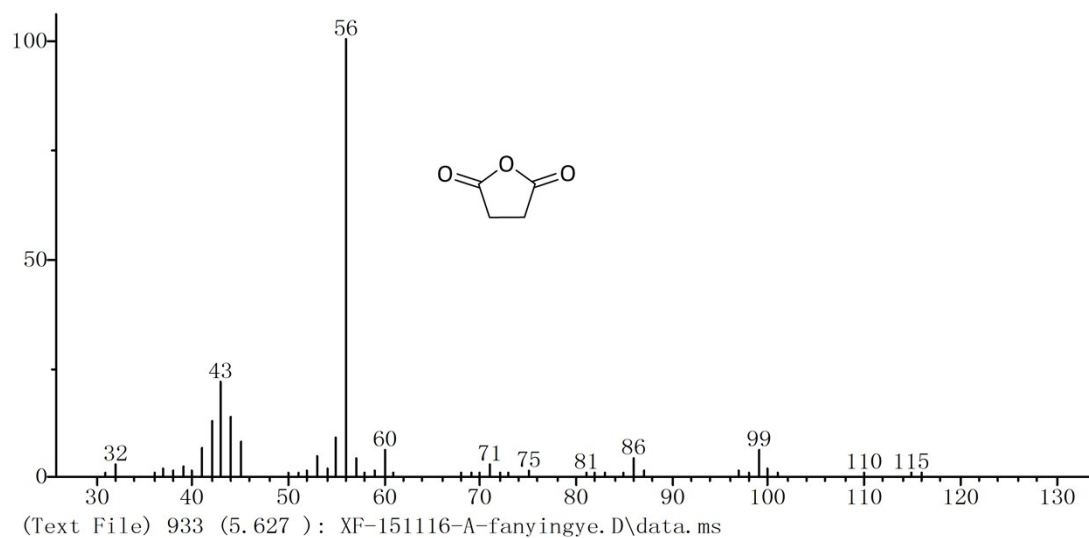

**Figure S9.** Mass spectrum of succinic anhydride (**6**). MS (70 eV):  $m/z$  (%), 100 (2) [M+], 116 (1), 99 (6), 86 (4), 75 (2), 71 (3), 60 (6), 56 (100), 55 (9), 43 (21), 32 (3).

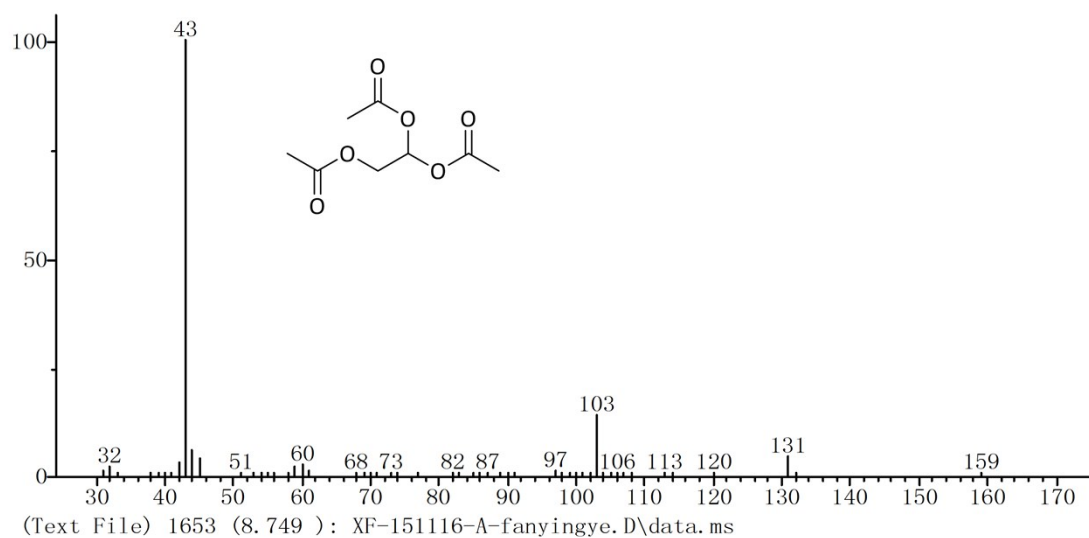

**Figure S10.** Mass spectrum of 1,1,2-ethanetriol triacetate (**7**). MS (70 eV):  $m/z$  (%), 204 (0) [M+], 131 (5), 103 (14), 60 (3), 43 (100), 32 (2).

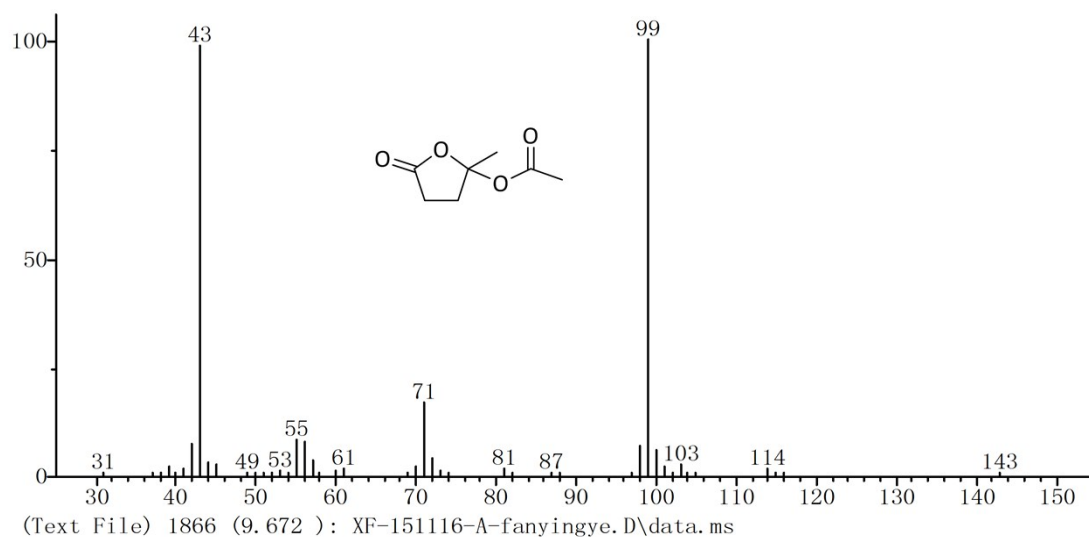

**Figure S11.** Mass spectrum of 2-methyl-5-oxotetrahydro-2-furanyl acetate (**8**). MS (70 eV):  $m/z$  (%), 158 (0) [M<sup>+</sup>], 143 (1), 122 (1), 116 (2), 99 (98), 87 (1), 81 (1), 71 (17), 61 (2), 55 (8), 45 (3), 43 (100), 31 (1).

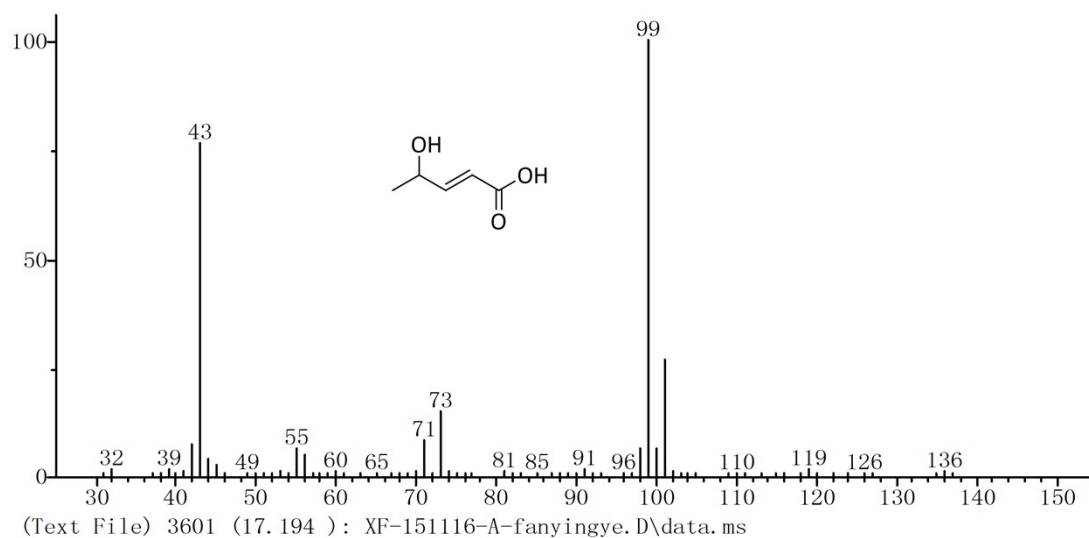

**Figure S12.** Mass spectrum of 4-hydroxy-2-pentenoic acid (**9**). 116 (1) [M<sup>+</sup>], 101 (26), 99 (100), 85 (1), 73 (15), 65 (1), 60 (1), 55 (7), 43 (77), 32 (1).



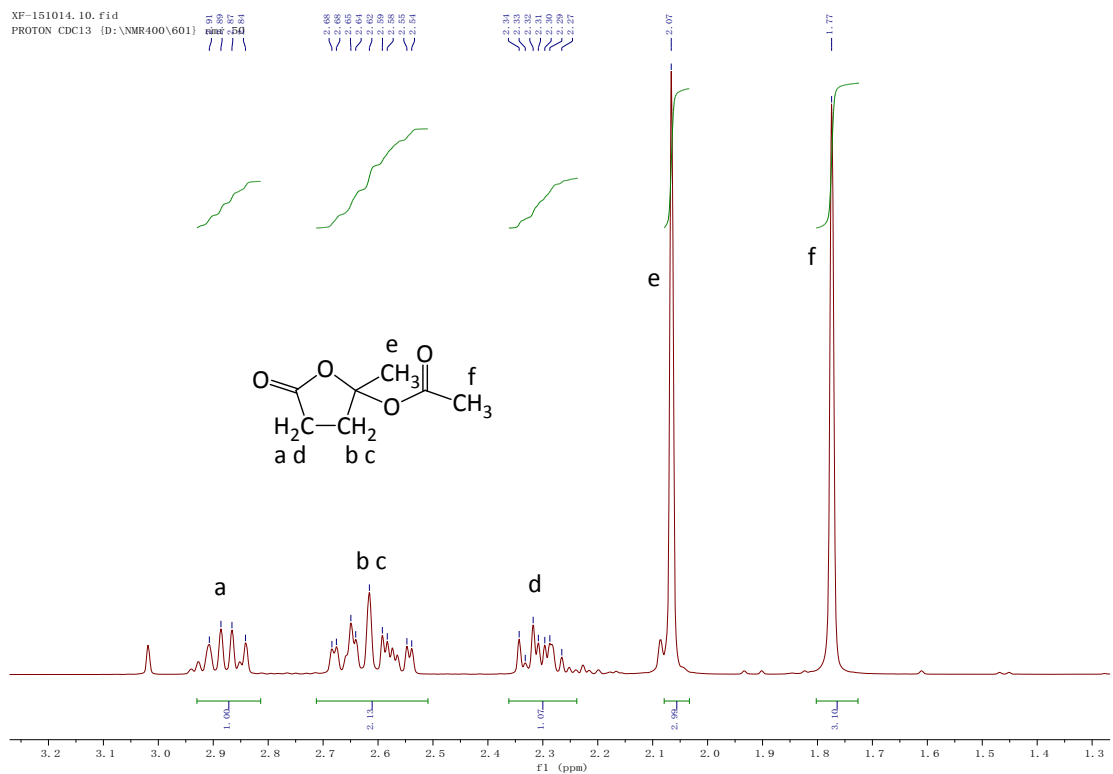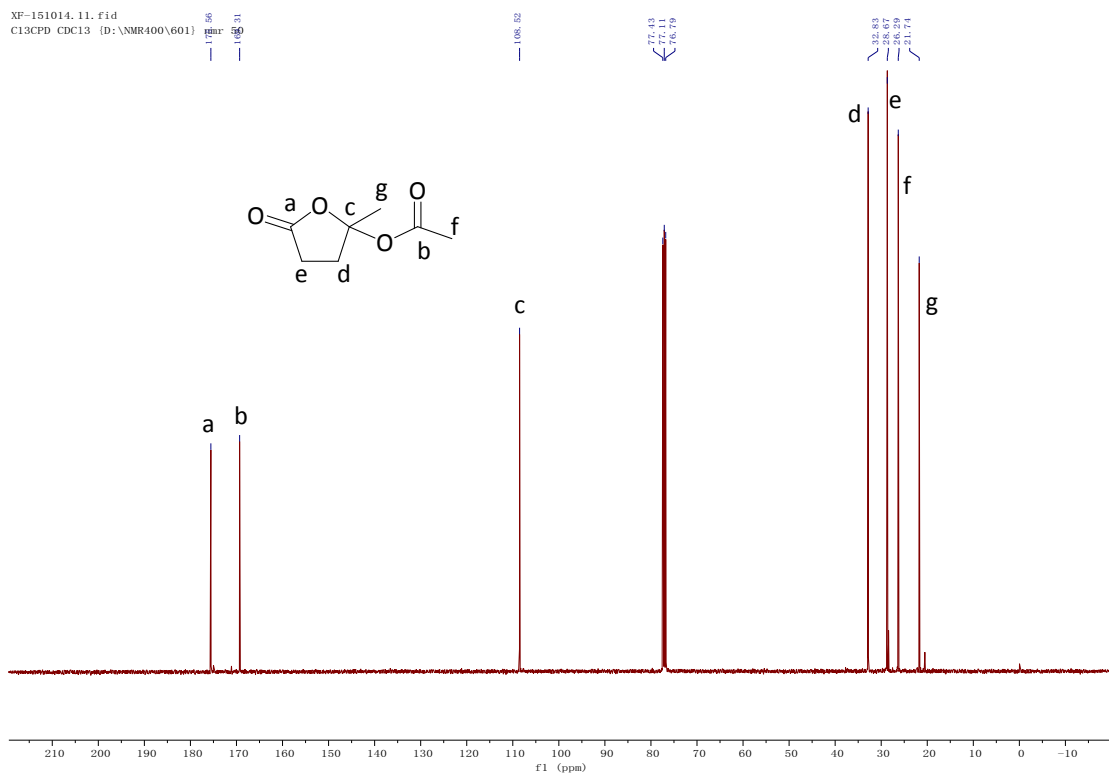

**Figure S13.**  $^1\text{H}$ -NMR and  $^{13}\text{C}$ -NMR characterization for 2-methyl-5-oxotetrahydro-2-furanyl acetate in  $\text{CDCl}_3$  at room temperature.

XF-151715-A. 10. f1d  
PROTON CDC13 (D:\NMR400\601) nmr 4

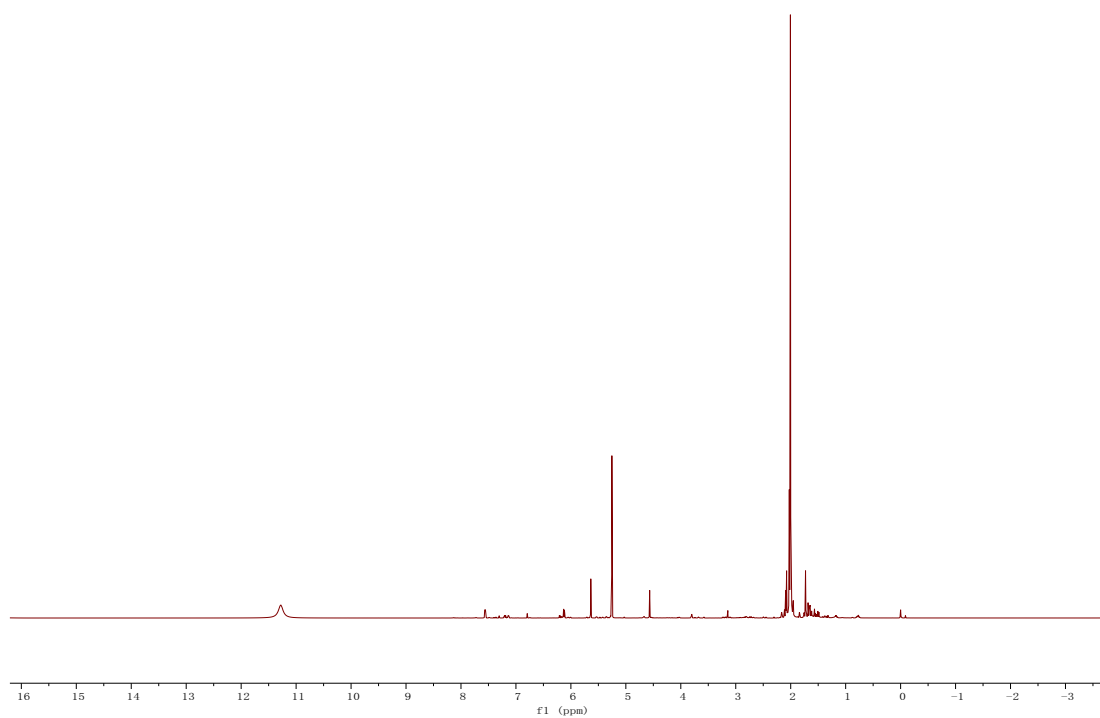

XF-151715-A. 11. f1d  
C13CPD CDC13 (D:\NMR400\601) nmr 4

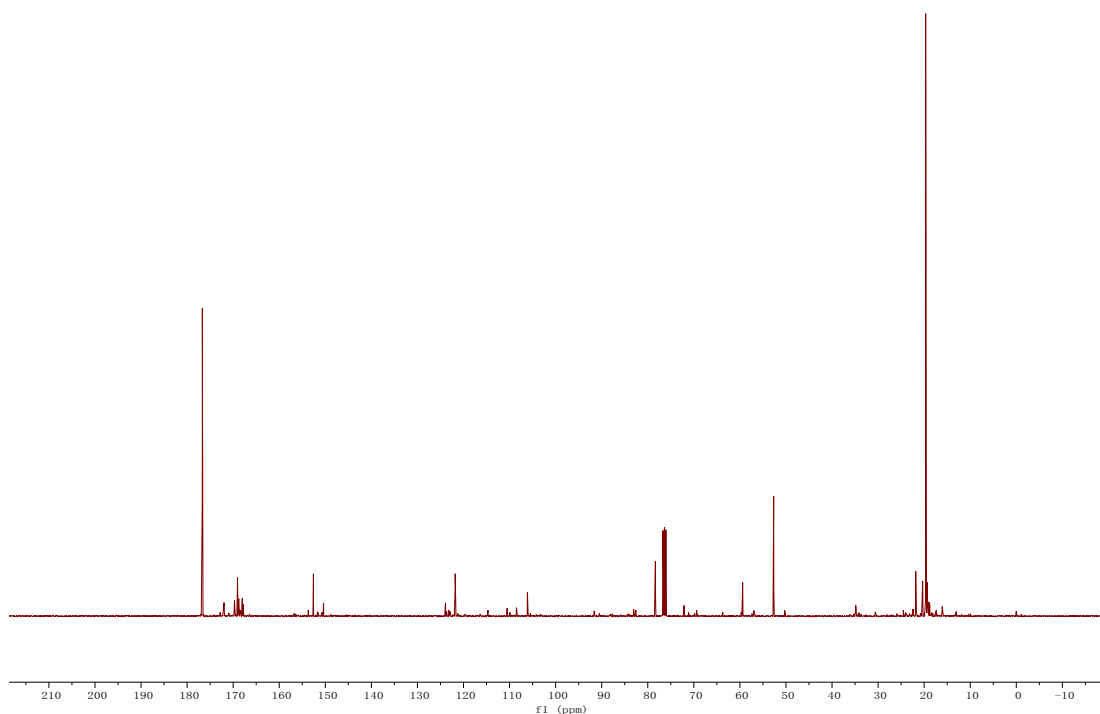

**Figure S14.** <sup>1</sup>H-NMR and <sup>13</sup>C-NMR characterization for side-products of oxidation of  $\alpha$ -angelica lactone

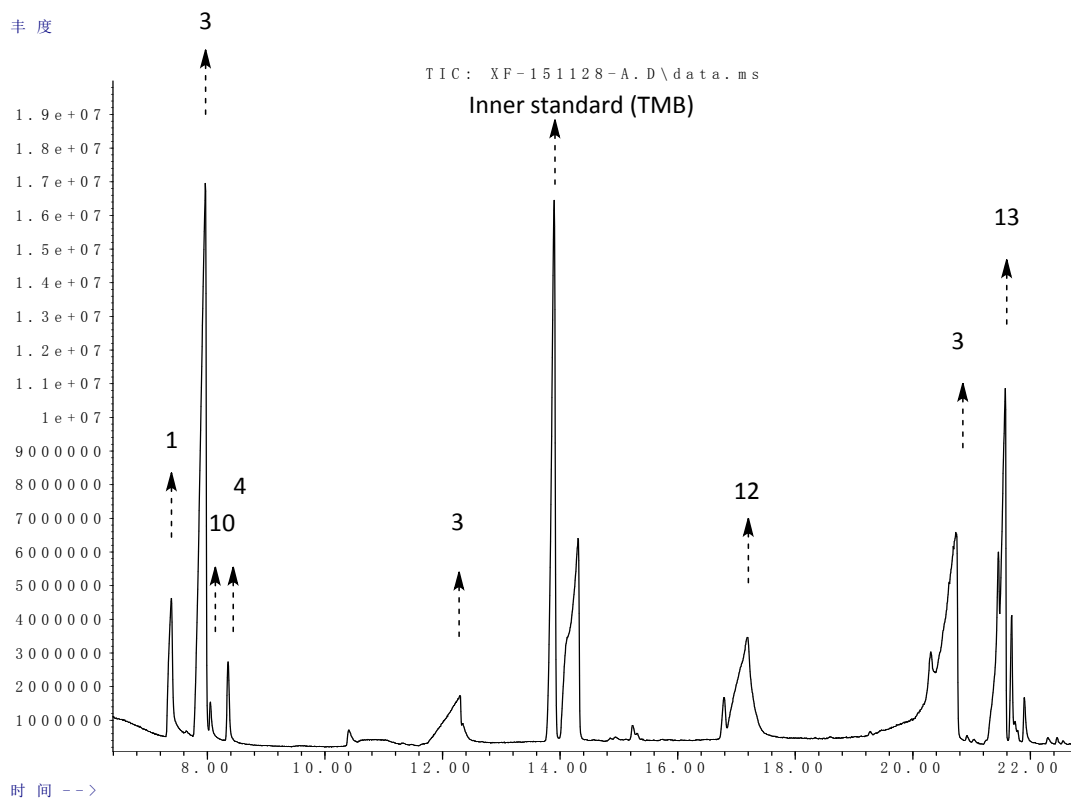

**Figure S15.** GC-MS Characterization for products of oxidation of  $\alpha$ -angelica lactone catalyzed by  $\text{Mn}(\text{OAc})_3 \cdot 2\text{H}_2\text{O}$ .

Peaks assignment of some main products, **1**: maleic anhydride, **3**: acetyloxy acetic acid, **4**: 1,1-ethanediol diacetate, **10**: 4-cyclopentene-1,3-dione, **12**: ethenyl acetate, **13**: 1,2,3,5-tetra-O-acetylpentofuranose.

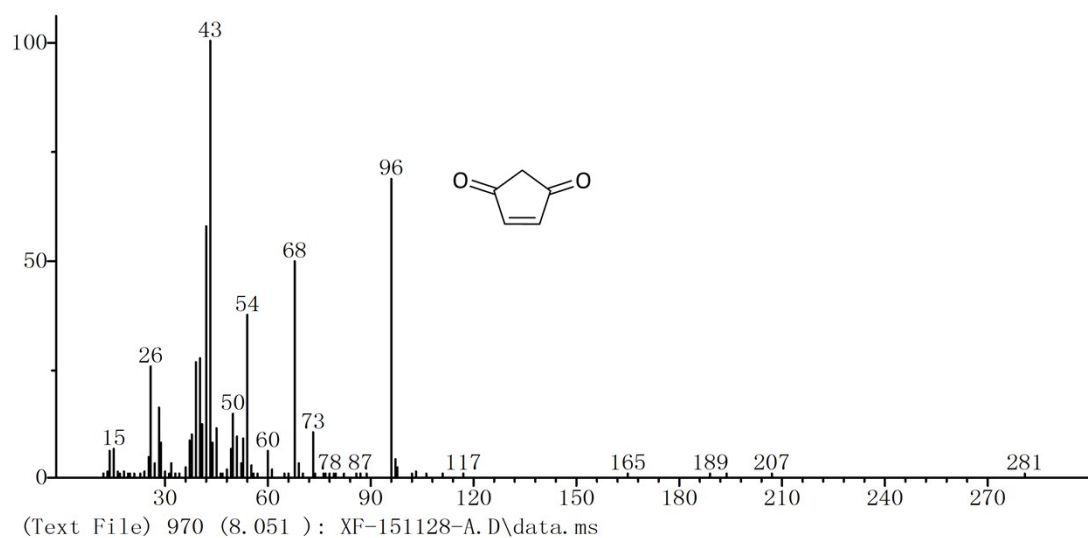

**Figure S16.** Mass spectrum of 4-cyclopentene-1,3-dione (**10**). MS (70 eV):  $m/z$  (%), 96 (55)  $[\text{M}^+]$ , 73 (11), 68 (40), 60 (5), 54 (32), 43 (100), 42 (45), 41 (10), 40 (23), 39 (19), 26 (25), 15 (7).

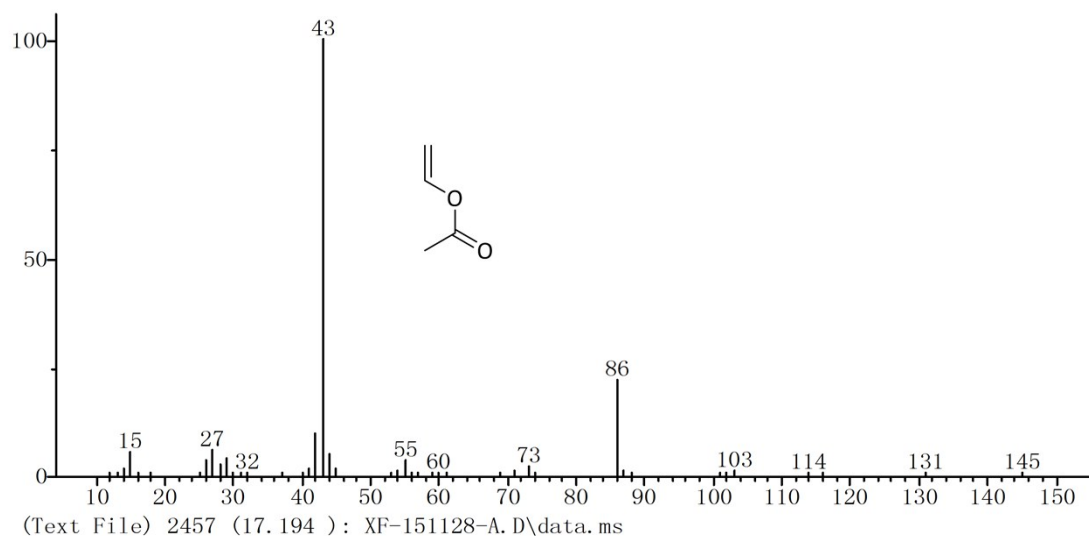

**Figure S17.** Mass spectrum of ethenyl acetate (**12**). MS (70 eV):  $m/z$  (%), 86(20) [M+], 73 (0), 55 (3), 43 (100), 27 (10), 15 (10).

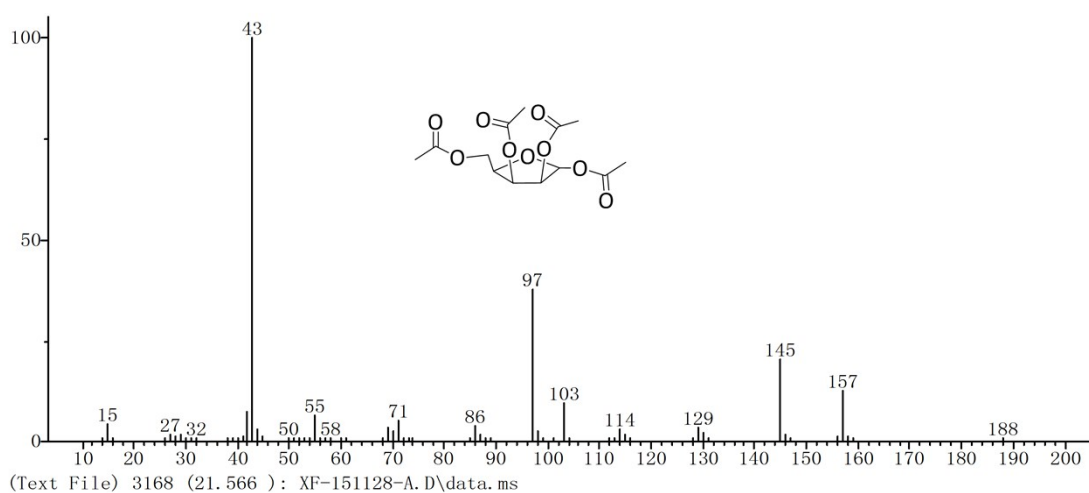

**Figure S18.** Mass spectrum of 1,2,3,5-tetra-O-acetylpentofuranose (**13**). MS (70 eV):  $m/z$  (%), 318 (0) [M+], 157 (12), 145 (19), 129 (4), 103 (10), 97 (37), 86 (3), 71 (5), 55 (6), 43 (100), 29 (2), 15 (4).
